# Supplementary material for: Identifying Cancer Subtypes from miRNA-TF-mRNA Regulatory Networks and Expression Data
Source: PubMed Central journal article supplement (PMC4818025; doi:10.1371/journal.pone.0152792), 2016-04-01
Supplement: pone.0152792.s003.pdf [file pone.0152792.s003.pdf]

**d. Ranking of features from miRNA-TF-mRNA regulatory network**

$$R = (1 - d) \times (I - dED^{-1})^{-1} \times e$$

$R$  is an  $N \times 1$  vector representing the ranking (importance) of each feature (mRNA, TF or miRNA).

$N$  is the number of features (mRNA, TF and miRNA) in the miRNA-TF-mRNA regulatory network.

$d$  is the damping factor.

$I$  is an  $N \times N$  identity matrix.

$E$  is an  $N \times N$  directed miRNA-TF-mRNA regulatory network matrix.

If feature  $i$  regulates feature  $j$ ,  $E_{ij} = 1$ ; otherwise  $E_{ij} = 0$ .

$D$  is an  $N \times N$  diagonal matrix,  $D_{jj} = \sum_i E_{ij}$  which means the total number of regulators feature  $i$  that regulate feature  $j$ .

$e$  is an  $N \times 1$  vector with all entries 1.

$$E: \begin{matrix} & & & j \\ & & & \\ & & & \\ i & \begin{bmatrix} 0 & 0 & 1 & 1 \\ 1 & 0 & 0 & 1 \\ 0 & 1 & 0 & 1 \\ 1 & 1 & 1 & 0 \end{bmatrix} & & \end{matrix}$$

An example 

**2. The Pearson Correlation Coefficient between the GeneRank result and the PageRank result**

The dataset is downloaded from the GeneRank Additional files.

(Available at <http://www.biomedcentral.com/1471-2105/6/233/additional>)

|                                                           |                                                                                           |
|-----------------------------------------------------------|-------------------------------------------------------------------------------------------|
|                                                           | <b>The ranking from GeneRank formula</b><br>(Integrated with MAD)<br>[Network: 4047x4047] |
| <b>Original MAD</b>                                       | 0.0104                                                                                    |
| <b>The ranking from PageRank formula</b><br>(Without MAD) | <b>0.9101</b>                                                                             |

The Pearson Correlation Coefficient between the GeneRank result and the PageRank result is 0.91 which means the MAD information is not effectively integrated in the GeneRank result.

**3. The Pearson Correlation Coefficient between NCIS result and PageRank result**

The datasets are downloaded from the NCIS Additional files.

(Available at <http://bioen-compbio.bioen.illinois.edu/NCIS/>)

|                                                        |                                                            |                          |
|--------------------------------------------------------|------------------------------------------------------------|--------------------------|
|                                                        | <b>The weight from NCIS formula</b> (Integrated with MAD ) |                          |
|                                                        | BRCA [network: 8726x8726]                                  | GBM [network: 7183x7183] |
| <b>Original MAD</b>                                    | 0.0918                                                     | 0.1                      |
| <b>The ranking form PageRank formula</b> (without MAD) | <b>0.9915</b>                                              | <b>0.9949</b>            |

For the high-dimension BRCA and GBM gene-gene networks, the Pearson Correlation Coefficient between NCIS result and PageRank result are **0.9915** and **0.9949**, respectively. The high correlation implies that the MAD information is not effectively integrated in the NCIS result.

## 2. Supplementary Figures

### 1. RNASeqV2

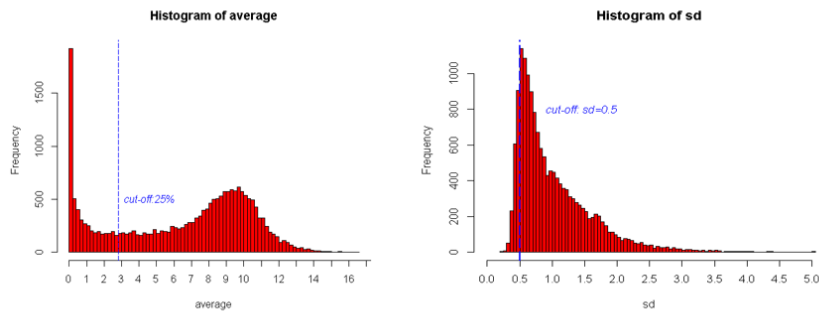

1, Remove the low expression genes

2, Remove the low variance genes

### 2. miRNASeq

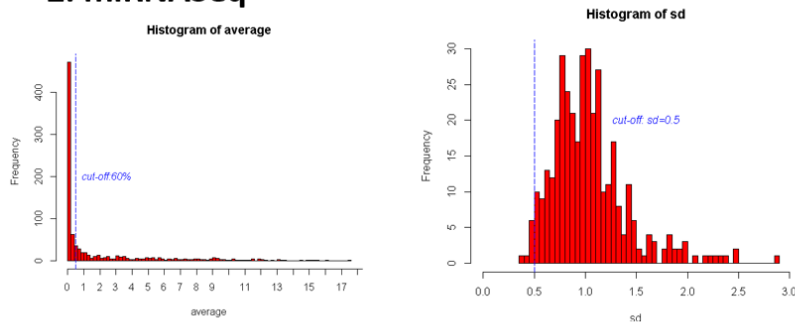

1, Remove the low expression miRNAs

2, Remove the low variance miRNAs

(a)

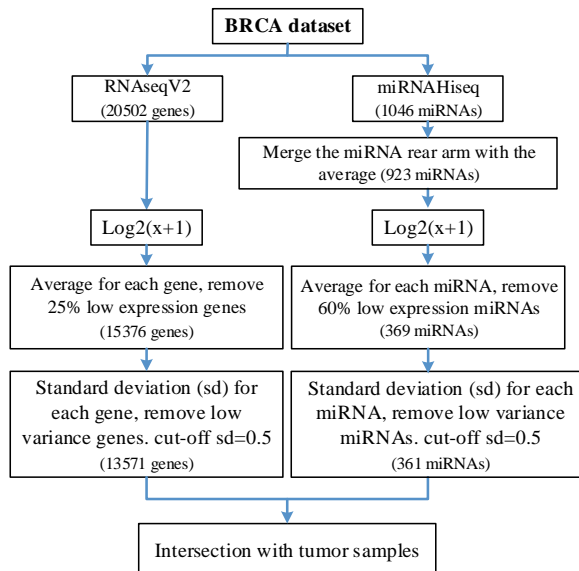

(b)

**Fig. S1. The data process of BRCA.**

Figure (a) shows the data distribution histogram and the cut-off points.

Figure (b) shows the processing flow of the BRCA RNASeq and miRNASeq datasets.

## 1. mRNA Expression (microarray)

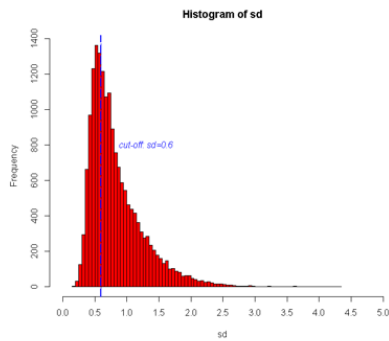

Remove the low variance genes

## 2. miRNA Expression (Agilent 8x15k)

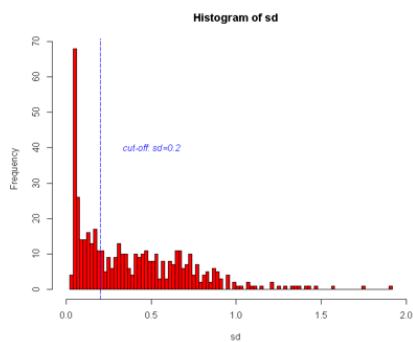

Remove the low variance miRNAs

(a)

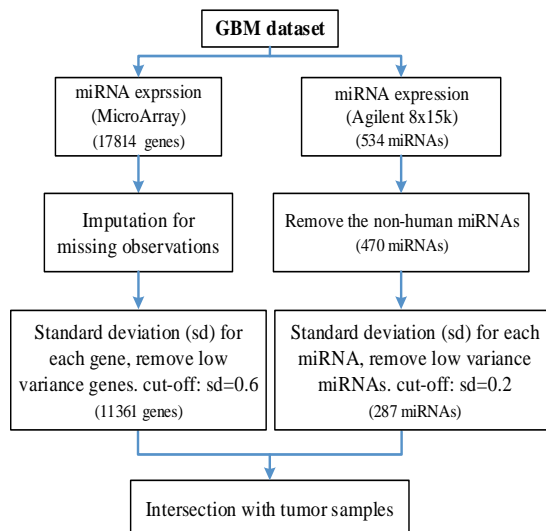

(b)

### Figure S2. The data process of GBM.

Figure (a) shows the data distribution histogram and the cut-off points.

Figure (b) shows the processing flow of the GBM mRNA and miRNA datasets.

### 3. Supplementary Tables

**Table S1** The number of the patients and the number of mRNA, TF and miRNA used in the experiments.

| Cancer Type | Patients Number | mRNA   | TF    | miRNA |
|-------------|-----------------|--------|-------|-------|
| <b>BRCA</b> | 587             | 12,233 | 1,338 | 361   |
| <b>GBM</b>  | 276             | 10,278 | 1,083 | 287   |

**Table S2** The interactions used for constructing the miRNA-TF-mRNA regulatory network for the GBM dataset.

|                             | Database        | Total interactions | Found interactions |
|-----------------------------|-----------------|--------------------|--------------------|
| miRNA → TF&<br>miRNA → mRNA | Tarbase v6.0    | 17,526             | 10,236             |
|                             | miRTarBase v4.5 | 37,423             | 19,880             |
|                             | miRecords v4    | 1,707              | 1,024              |
|                             | starBase 2.0    | 320,709            | 155,144            |
|                             | ENCODE [25]     | 117,193            | 33,775             |
| TF → miRNA                  | ENCODE [25]     | 1,648              | 546                |
|                             | Transmir v1.2   | 649                | 427                |
| TF → mRNA                   | ENCODE ChIP-Seq | 229,486            | 82,960             |
|                             | TRED            | 7,066              | 3,921              |
| TF → TF&<br>mRNA → mRNA     | Reactome        | 127,452            | 50,269             |
|                             | STRING v10.0    | 250,843            | 89,911             |
